# Supplementary material for: An automated framework for hypotheses generation using literature
Source: Springer Nature journal article supplement (doi:10.1186/1756-0381-5-13), 2012-08-29
Supplement: 13040_2012_71_MOESM2_ESM.pdf [file 13040_2012_71_MOESM2_ESM.pdf]

Disease X

Disease Y

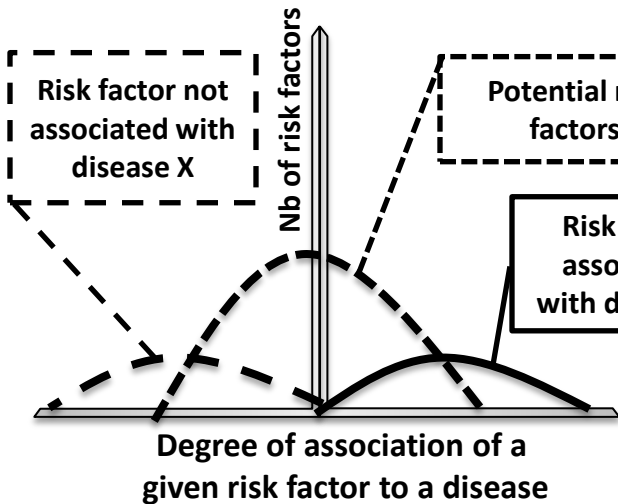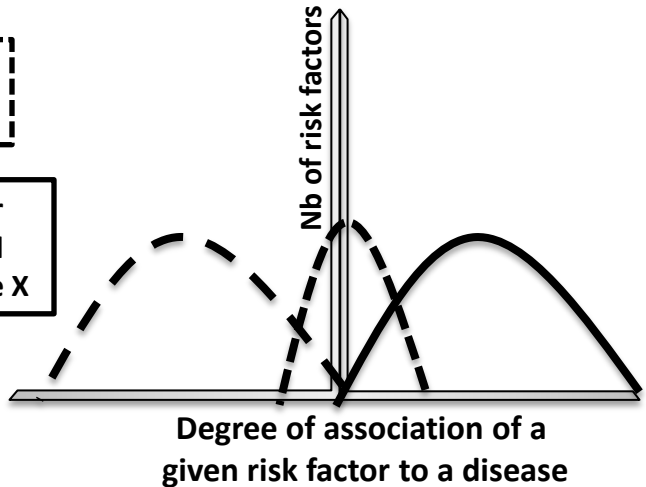

Base knowledge about a given disease
