# Supplementary material for: An automated framework for hypotheses generation using literature
Source: Springer Nature journal article supplement (doi:10.1186/1756-0381-5-13), 2012-08-29
Supplement: 13040_2012_71_MOESM3_ESM.pdf [file 13040_2012_71_MOESM3_ESM.pdf]

## Ischemic Stroke

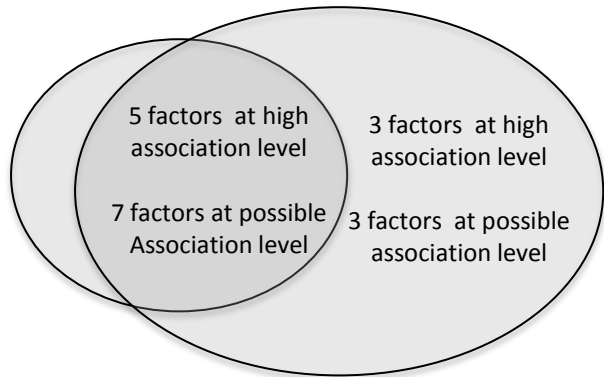

MedLink Neurology

HGF

## Parkinson's Disease

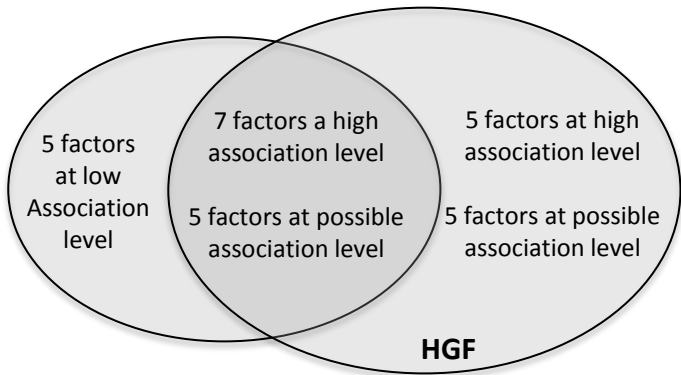

MedLink Neurology

HGF
