# Supplementary material for: An automated framework for hypotheses generation using literature
Source: Springer Nature journal article supplement (doi:10.1186/1756-0381-5-13), 2012-08-29

# Similarity score distribution for risk factors

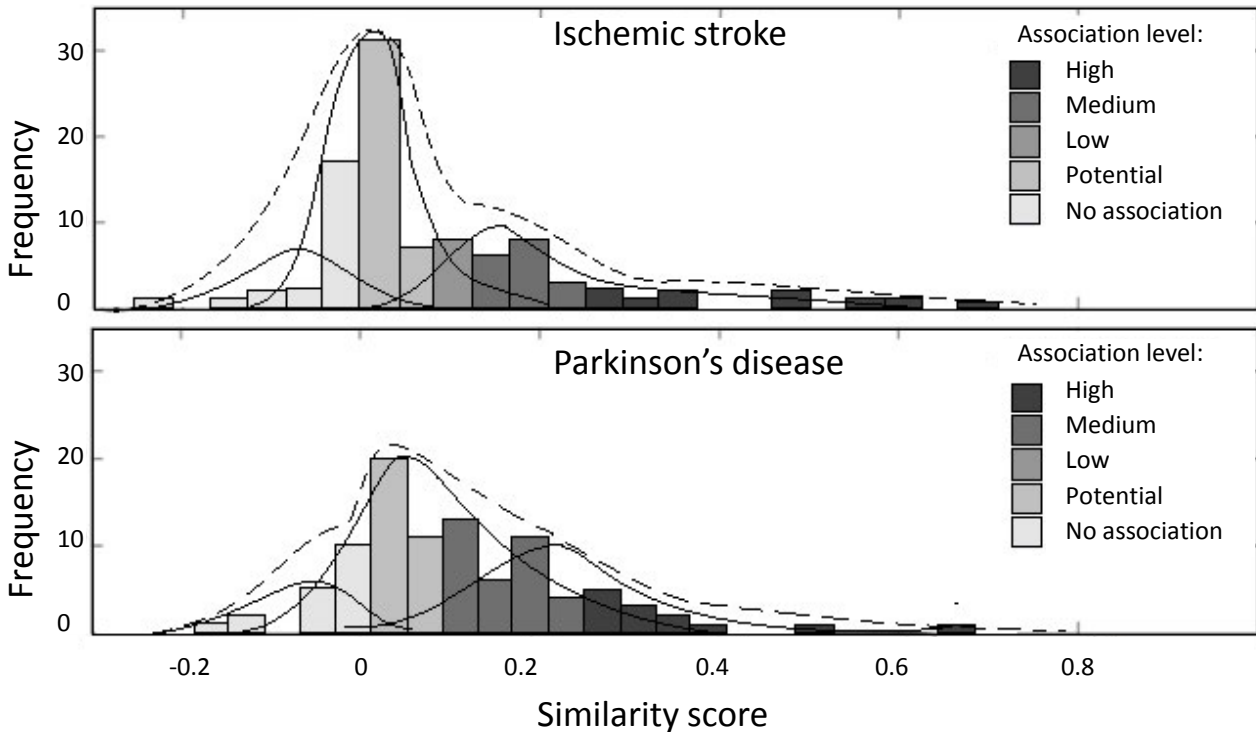

Supplement: 13040_2012_71_MOESM4_ESM.pdf [file 13040_2012_71_MOESM4_ESM.pdf]
